# Supplementary material for: New molecular evidence for surface and sub-surface soil erosioncontrols on the composition of stream DOM during storm events
Source: Copernicus journal article supplement (doi:10.5194/bg-2017-252), 2017-07-03

Variation in stream discharge and DOC concentration during the three storm event followed in this study.

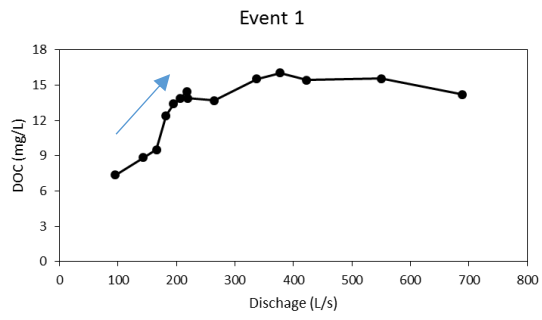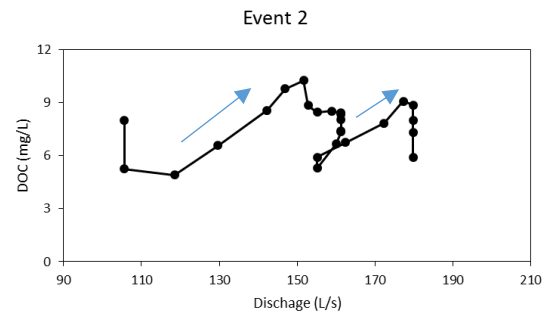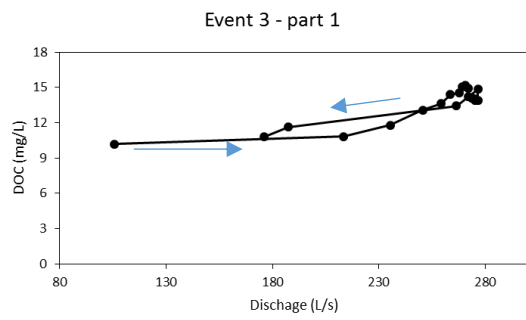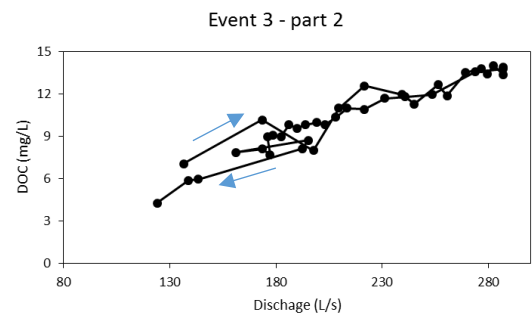

Variation in stream discharge and DOC concentration during six storm events sampled during hydrological year 2013/2014. These storm events were not added to this study.

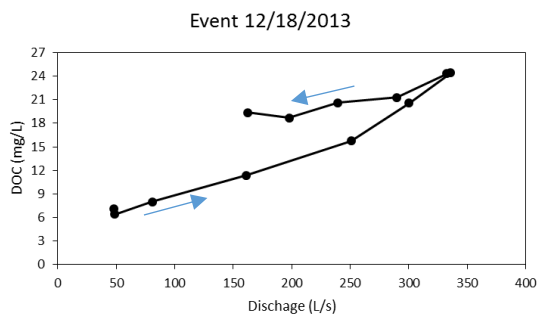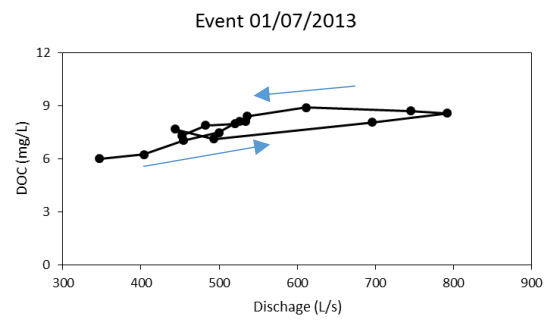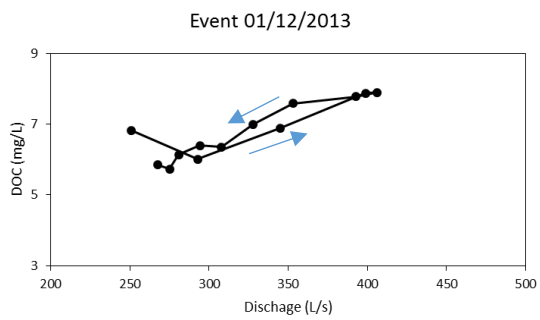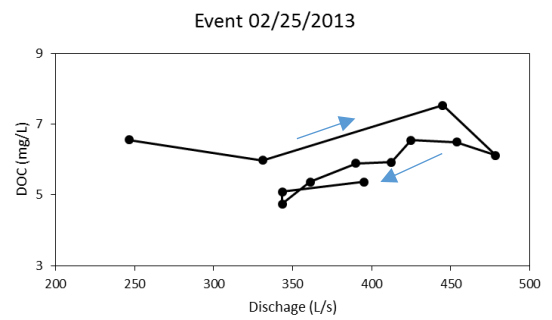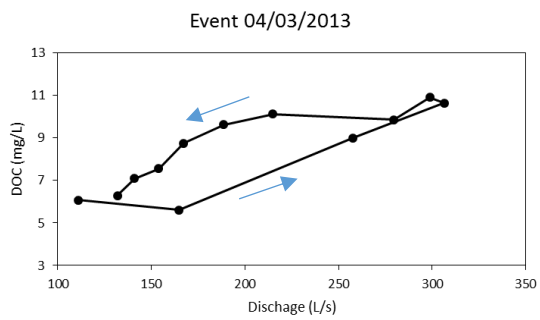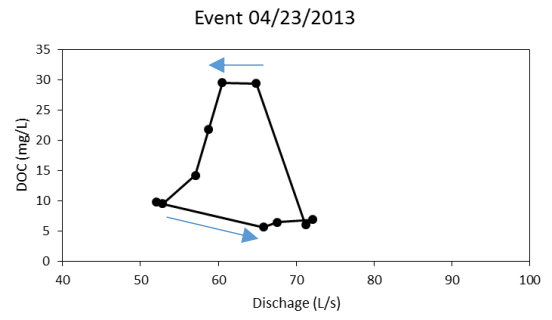

Supplement: Supplementary file [file bg-2017-252-AC1-supplement.pdf]
